# Supplementary material for: Incorporation ofN-phenyl in poly(benzimidazole imide)s and improvement in H2O-absorbtion and transparency
Source: Royal Society of Chemistry journal article supplement (doi:10.1039/d0ra10138a), 2021-01-01
Supplement: d0ra10138a1.pdf [file d0ra10138a1.pdf]

**Electronic Supplementary Information (ESI):**

Incorporation of N-phenyl in poly(benzimidazole imide)s and improvement in H<sub>2</sub>O-absorbtion and transparency

Guangtao Qian, Fengna Dai, Haiquan Chen, Mengxia Wang, Mengjie Hu, Chunhai Chen and Youhai Yu\*

Center for Advanced Low-Dimension Materials, State Key Laboratory for Modification of Chemical Fibers and Polymer Materials, College of Material Science and Engineering, Donghua University, Shanghai 201620, P. R. China

\* E-mail: [yuyouhai@dhu.edu.cn](mailto:yuyouhai@dhu.edu.cn)

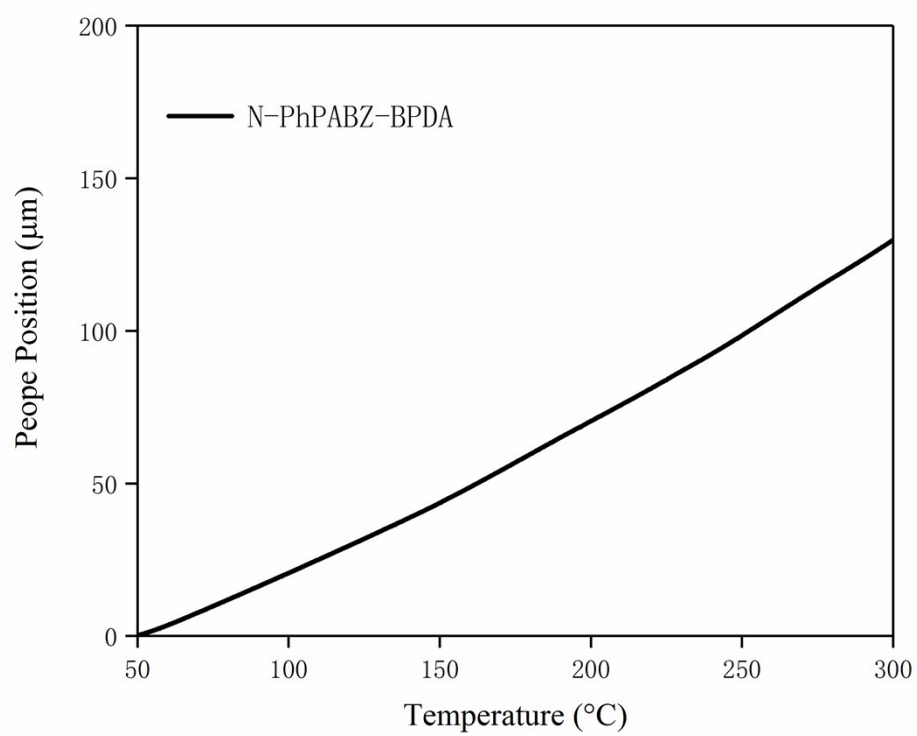

Fig. S1 TMA curves of N-PhPABZ-BPDA.

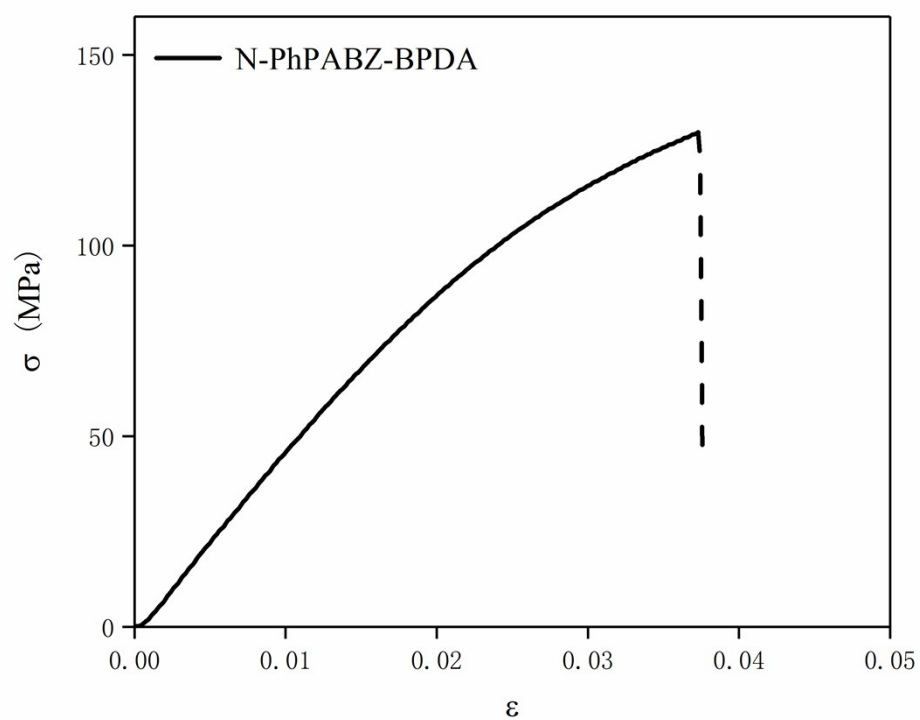

Fig. S2 Stress-strain curves of N-PhPABZ-BPDA.
